# Supplementary material
Source: PubMed Central journal article supplement (PMC4627437)
Supplement: ry142201suppa1.pdf [file ry142201suppa1.pdf]

## Appendix E1

The typical multicomponent spin-echo T2-mapping technique requires acquisition of images at varying echo time, and the image data are fit using a multiexponential decay model. In comparison, the mcDESPOT method fits observed spoiled gradient-recalled echo and balanced steady-state free precession signals at varying flip angle. The observed spoiled gradient-recalled echo and balanced steady-state free precession signals can be modeled by using a two-pool water exchanging system at steady-state condition as described below.

Consider a composite spin system including two exchanging water pools (fast (F) and slow (S) relaxing water pools) described in the mcDESPOT method. On the basis of the Bloch-McConnell equation, the spin evolution of magnetization can be expressed as follows:

$$\frac{dM}{dt} = AM + C,$$

where vector  $M = [M_{x,F} \ M_{x,S} \ M_{y,F} \ M_{y,S} \ M_{z,F} \ M_{z,S}]^T$  contains components of the transverse (x, y) and longitudinal (z) magnetizations of each pool, and vector

$C = \rho [0 \ 0 \ 0 \ 0 \ R_{1,F}f_F \ R_{1,S}f_S]^T$ . Here, 'T' denotes the transpose operation and  $\rho$  is the proton density term,  $f_F$  and  $f_S$  are fractional magnetizations for fast and slow water proton pools normalized by total water magnetization, respectively.  $R_l = 1/T_l$  is longitudinal relaxation rate.  $d$  is the notation symbol for differentiation,  $t$  is time. All relaxation and exchange terms are included into a matrix,  $A$ , defined as follows:

$$A = \begin{pmatrix} A_1 & 0 \\ 0 & A_2 \end{pmatrix}$$

$$A_1 = \begin{pmatrix} -R_{2,F} - k_{FS} & k_{SF} & \Delta\omega & 0 \\ k_{FS} & -R_{2,S} - k_{SF} & 0 & \Delta\omega \\ -\Delta\omega & 0 & -R_{2,F} - k_{FS} & k_{SF} \\ 0 & -\Delta\omega & k_{FS} & -R_{2,S} - k_{SF} \end{pmatrix}$$

$$A_2 = \begin{pmatrix} -R_{1,F} - k_{FS} & k_{SF} \\ k_{FS} & -R_{1,S} - k_{SF} \end{pmatrix},$$

where  $k_{SF}$ ,  $k_{FS}$  are rates of (diffusion-driven) magnetization exchange between S and F pools and vice versa, respectively, and  $\Delta\omega$  is the off-resonance frequency caused by  $B_0$  field inhomogeneity.  $R_2 = 1/T_2$  is the transverse relaxation rate. At chemical equilibrium, the fractional magnetization and exchange rates are related by:

$$k_{FB}f_F = k_{SF}f_S$$

For the balanced steady-state free precession signals (bSSFP) signal, an analytical solution of the above equation can be derived for the steady-state magnetization,  $M_{\text{bSSFP}}^{\text{SS}}$  :

$$M_{\text{bSSFP}}^{\text{SS}} = \left[ I - e^{A \cdot \text{TR}} R_{\alpha} \right]^{-1} \left( e^{A \cdot \text{TR}} - I \right) A^{-1} C$$

where  $M_{\text{bSSFP}}^{\text{SS}} = \left[ M_{x,F}^{\text{SS}} \quad M_{x,S}^{\text{SS}} \quad M_{y,F}^{\text{SS}} \quad M_{y,S}^{\text{SS}} \quad M_{z,F}^{\text{SS}} \quad M_{z,S}^{\text{SS}} \right]^T$ ,  $I$  is the  $6 \times 6$  identity matrix, TR is the sequence repetition time and matrix  $R_{\alpha}$  is a rotation matrix with the prescribed flip angle  $\alpha$ , expanded as follows:

$$R_{\alpha} = \begin{pmatrix} 1 & 0 & 0 & 0 & 0 & 0 \\ 0 & 1 & 0 & 0 & 0 & 0 \\ 0 & 0 & \cos \alpha & 0 & \sin \alpha & 0 \\ 0 & 0 & 0 & \cos \alpha & 0 & \sin \alpha \\ 0 & 0 & -\sin \alpha & 0 & \cos \alpha & 0 \\ 0 & 0 & 0 & -\sin \alpha & 0 & \cos \alpha \end{pmatrix}$$

The observed bSSFP signal,  $M_{\text{bSSFP}}^{\text{obs}}$ , is calculated as the magnitude of the complex summation of the transverse magnetizations of water components F and S:

$$M_{\text{bSSFP}}^{\text{obs}} = \left| \left( M_{x,F}^{\text{SS}} + iM_{y,F}^{\text{SS}} \right) + \left( M_{x,S}^{\text{SS}} + iM_{y,S}^{\text{SS}} \right) \right|$$

Spoiled gradient-recalled echo (SPGR) signal can be derived in a similar fashion. An analytical solution to the equation for the steady-state signal at SPGR sequence,  $M_{\text{SPGR}}^{\text{SS}}$ , can be expressed in the matrix form yielding the steady-state magnetization:

$$M_{\text{SPGR}}^{\text{SS}} = \rho \left[ I - e^{A_2 \cdot \text{TR}} \cos \alpha \right]^{-1} \left( I - e^{A_2 \cdot \text{TR}} \right) \begin{bmatrix} f_F \\ f_S \end{bmatrix}$$

where  $M_{\text{SPGR}}^{\text{SS}} = \left[ M_{z,F}^{\text{SS}} \quad M_{z,S}^{\text{SS}} \right]^T$ , and  $I$  is now the  $2 \times 2$  identity matrix. The observed SPGR signal,  $M_{\text{SPGR}}^{\text{obs}}$ , can be calculated as follows:

$$M_{\text{SPGR}}^{\text{obs}} = \sin \alpha \left( M_{z,F}^{\text{SS}} + M_{z,S}^{\text{SS}} \right)$$
